# Supplementary material for: Utility of the Physical Examination in Detecting Pulmonary Hypertension. A Mixed Methods Study
Source: PLoS One. 2014 Oct 24;9(10):e108499. doi: 10.1371/journal.pone.0108499 (PMC4208756; doi:10.1371/journal.pone.0108499)
Supplement: Table S1 — Summary of the 31 studies were identified that assess the physical examination in pulmonary hypertension and were included in the final analysis. (DOCX) [file pone.0108499.s002.docx]

Table S1

| **Study** | **Design** | **Study population** | **Diagnostic Intervention Studied** | **PH diagnostic test** | **Proportion of patients with PH** |
| --- | --- | --- | --- | --- | --- |
| Bleifer et al. 1960[16](#_ENREF_16) | CS | VSD | Phonocardiography with simultaneous carotid artery pulse tracing (for timing the second heart sounds) | RHC | 7/44 |
| Chan et al. 2013[7](#_ENREF_7) | PC | PAH | Phonocardiography | RHC | 40/170 |
| Chen et al. 1996[29](#_ENREF_29) | CS | bioprosthetic AV or OM | Phonocardiography | 2D echo with doppler | 19/89 |
| Craige, 1959[15](#_ENREF_15)+ | CS | VSD | Phonocardiography, ecg | RHC | 13/35 |
| Gamboa et al., 1965[30](#_ENREF_30)+ | CS | VSD | Phonocardiography | RHC | 18/30 |
| Ghose et al. 1972[31](#_ENREF_31)+ | CaS | IPAH | Physical examination | RHC | 8/8 |
| Goryanina NK. 1964[18](#_ENREF_18) | No methods | AV stenosis and CHD | Phonocardiography | ? | ?/131 |
| Harris & Sutton, 1968[25](#_ENREF_25)+ | CS | Normal subjects | Phonocardiography | No measurement of PAP | 0/162 |
| Harris 1970[21](#_ENREF_21)+ | no methods | PH in CHD | no methods | No methods | 167/167 |
| Hollman et al. 1963 [32](#_ENREF_32) | CS | VSD | Phonocardiography | Pulmonary artery manometry at time of cardiac surgery | 40/93# |
| Hubbard et al. 1957[33](#_ENREF_33)+ | RC | VSD | Physical examination | RHC | 39/50  (5/6 adults) |
| Kambe et al., 1978[34](#_ENREF_34) | CS | pulmonary regurgitation | Intrathoracic phonocardiography | RHC | 10/14 |
| Kapoor et al. 1968[35](#_ENREF_35) | CS | cor pulmonale | Physical examination | ? | 55/55 |
| Karnegis & Wang, 1964[17](#_ENREF_17) | CS | idiopathic PA dilatation | Phonocardiography, | RHC | 0/8 |
| Leatham & Gray 1956[22](#_ENREF_22) | CS | ASD; excluded severe pulmonary stenosis | Phonocardiography, auscultation | RHC | 10/40 |
| Leatham & Vogelpel, 1953[36](#_ENREF_36) | CS | patients with early systolic sounds | Phonocardiography, auscultation | RHC | 44/50 |
| Leo & Hultgren 1959[37](#_ENREF_37)+ | CS | mitral stenosis | Phonocardiography, auscultation | RHC or intraoperative measurements | 6/20 |
| Lessof 1959[38](#_ENREF_38)+ | CS | VSD | Phonocardiography, auscultation | RHC | ?/60 (?5 but does not indicate if there were more) |
| Longhini et al. 1991[39](#_ENREF_39) | CS | mitral stenosis | Phonocardiography with computer analysis | RHC | 6/30 |
| Lukomsky 1965[40](#_ENREF_40) | CS | mitral stenosis | Phonocardiography | RHC or measurement of pressure at time of mitral commisurotomy | 64/76* |
| Maciera-Coelho & Guimaraes. 1964[41](#_ENREF_41) | CS | ASD | Phonocardiography | RHC | 8/25 |
| Pilatis et al. 2000[26](#_ENREF_26) | RC | Liver transplant | Physical examination | RHC | 8/55 |
| Portaluppi et al. 1980[42](#_ENREF_42)+ | RC | acquired AS | Phonocardiography | RHC | 6/19* |
| Rich et al. 1987[43](#_ENREF_43)+ | CS?observational | primary pulmonary hypertension | Physical examination | RHC | 187/187 |
| Shaver et al. 1974[20](#_ENREF_20) | CS | mixed cardiac issues | Intracardiac phonocardiography | RHC | 9/22 |
| Slodki & Shah. 1965[19](#_ENREF_19) | CS | mitral valve disease or cor pulmonale | Phonocardiography | Not specified | 61/61 |
| Stein, Sabbah et al. 1980[44](#_ENREF_44) | CS | PH and controls | Intracardiac sound | RHC | 16/24 |
| Sutton et al. 1968[24](#_ENREF_24)+ | CS | PH secondary to CHD, PPH, group III PH | Phonocardiography | RHC | 116/150 |
| Ungerer et al. 1983[28](#_ENREF_28) | PC | PH secondary to systemic sclerosis | Physical examination | RHC | 16/49* |
| Wood 1952[23](#_ENREF_23) | RC | PH secondary to various causes | Physical examination | RHC | 44/44 |
| Xu et al., 2002[8](#_ENREF_8) | CS | mixed cardiac disease: (AS, AI, MS, MR, CAD, AMI, CHF, CM) | Phonocardiography | RHC | 10/23** |

+: study included children, CS: cross-sectional study, CaS: case series, PC: prospective cohort study, RC: retrospective cohort study, RHC: right heart catheterization, *:defined PH as mPAP ≥20mmHg, **:defined PH as sPAP >35mmHg

#: PH defined as mPAP ≥30% of systemic pressure as described by authors and in absence of additional information
